# Supplementary material for: Interplay between the oxidation process and cytotoxic effects of antimonene nanomaterials
Source: Royal Society of Chemistry journal article supplement (doi:10.1039/d4nr00532e), 2024-01-01
Supplement: d4nr00532e1.pdf [file d4nr00532e1.pdf]

## Supporting Information

### The interplay between oxidation process and cytotoxicity effects of antimonene nanomaterials

Pau Congost-Escoin,<sup>a</sup> Matteo Andrea Lucherelli,<sup>a</sup> Víctor Oestreicher,<sup>a</sup> Guillermo García-Lainez,<sup>b</sup> Marta Alcaraz,<sup>a</sup> Martín Mizrahi,<sup>c,d</sup> Maria Varela,<sup>e</sup> Inmaculada Andreu<sup>\*f,g</sup> and Gonzalo Abellán<sup>\*a</sup>

<sup>a</sup> Instituto de Ciencia Molecular (ICMol), Universitat de València. Catedrático José Beltrán Martínez nº 2, 46980 Paterna, Spain.

<sup>b</sup> Instituto de Investigación Sanitaria (IIS) La Fe, Hospital Universitari i Politècnic La Fe, Avenida de Fernando Abril Martorell 106, 46026, Valencia, Spain.

<sup>c</sup> Instituto de Investigaciones Fisicoquímicas Técnicas y Aplicadas (INIFTA), Departamento de Química, Facultad de Ciencias Exactas. Universidad Nacional de La Plata, CCT La Plata-CONICET. Diagonal 113 y 64, 1900, La Plata, Argentina.

<sup>d</sup> Facultad de Ingeniería, Universidad Nacional de La Plata. Calle 1 esq. 47, 1900, La Plata, Argentina. <sup>e</sup> Instituto Pluridisciplinar & Departamento de Física de Materiales, Universidad Complutense de Madrid (UCM), 28040 Madrid, Spain.

<sup>f</sup> Departamento de Química. Universitat Politècnica de València, Camino de Vera s/n, 46022, Valencia, Spain.

<sup>g</sup> Unidad Mixta de Investigación Universitat Politècnica de València-Instituto de Investigación Sanitaria La Fe, Hospital Universitari i Politècnic La Fe, Avenida de Fernando Abril Martorell 106, 46026, Valencia, Spain.

e-mails: [gonzalo.abellan@uv.es](mailto:gonzalo.abellan@uv.es) , [iandreur@qim.upv.es](mailto:iandreur@qim.upv.es)

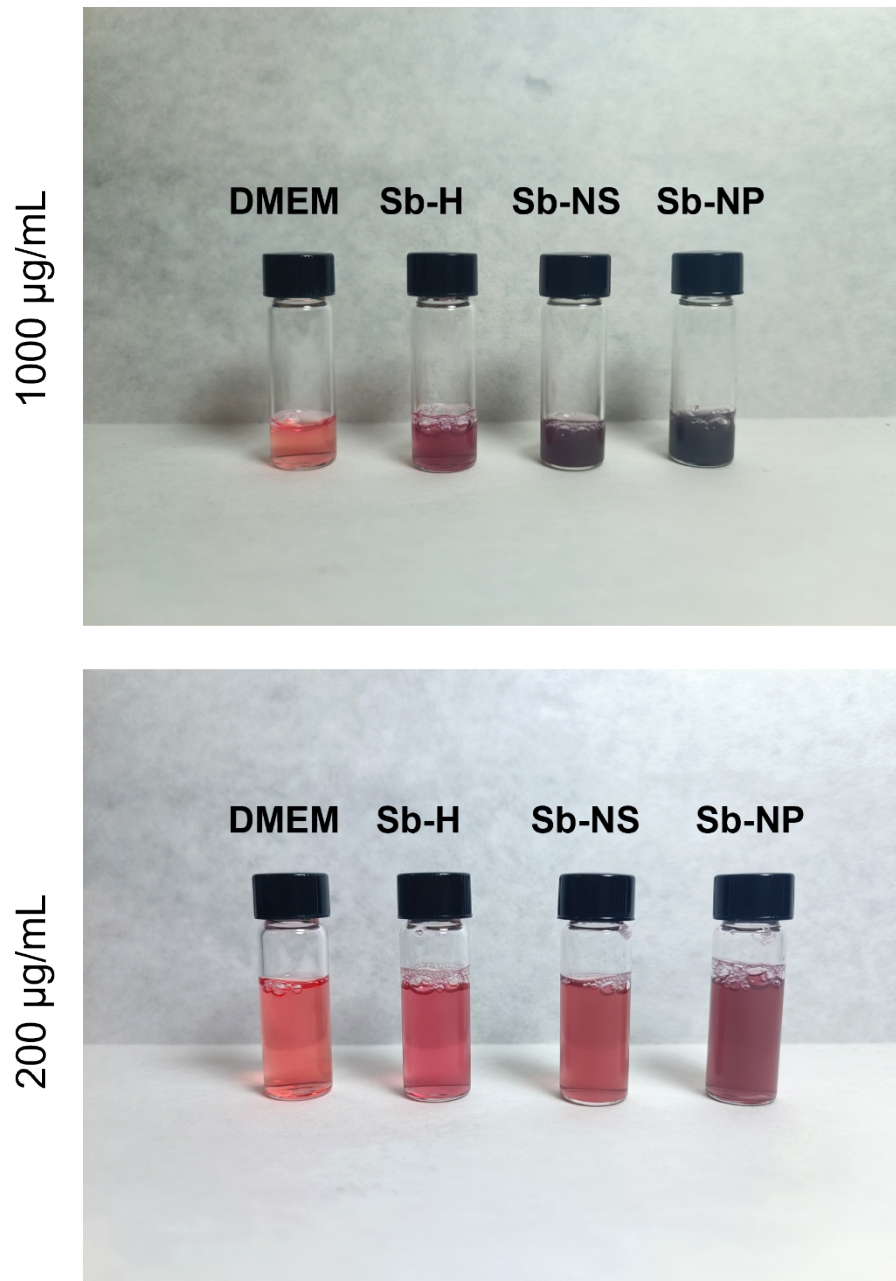

**Figure S1:** Photographs of the of the DLS dispersions at 1 mg/ml (resuspended concentration) and at 200 g/ml.

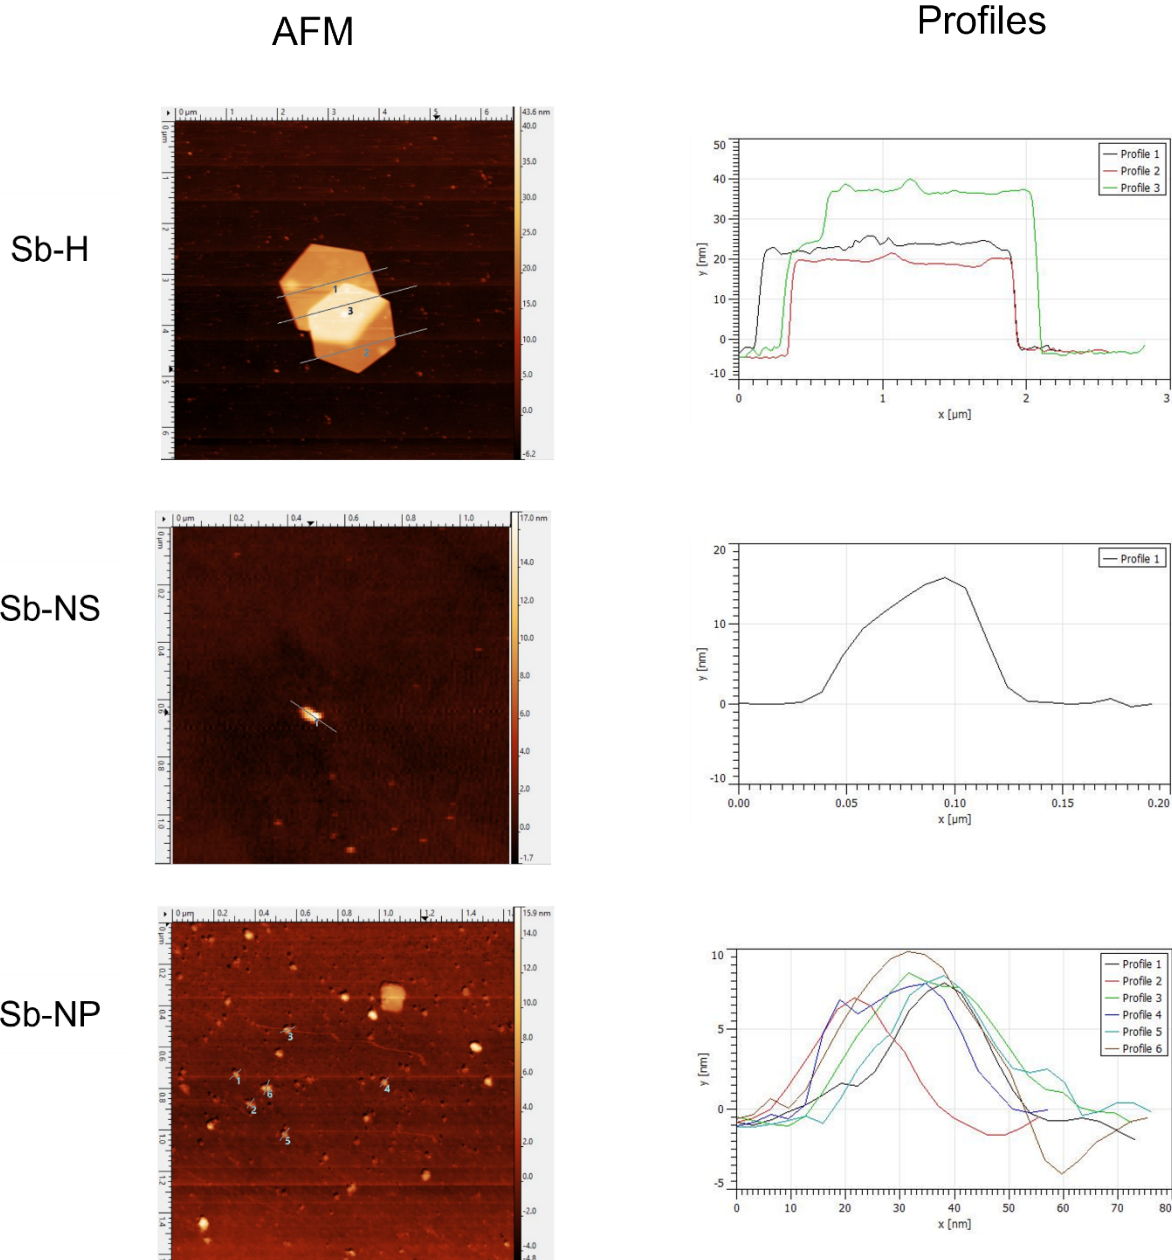

**Figure S2:** AFM images of the obtained Sb-Nanomaterials. AFM profiles showed on left correspond to the lines indicated in the images.

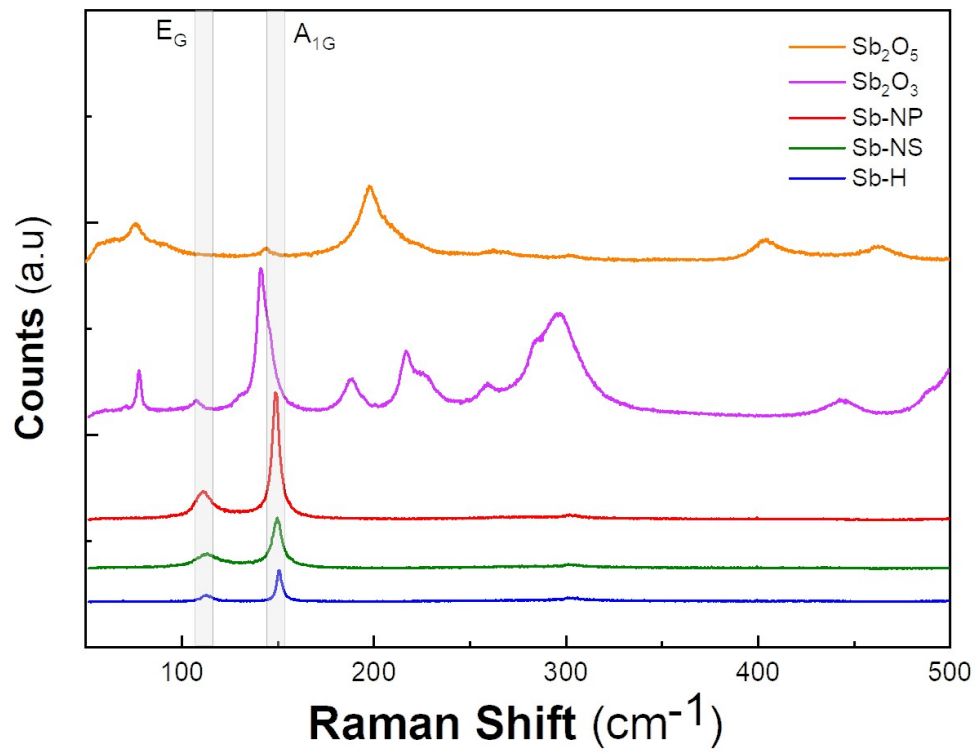

**Figure S3:** Comparison of the Raman spectra of the Sb-nanomaterials and Sb oxides.

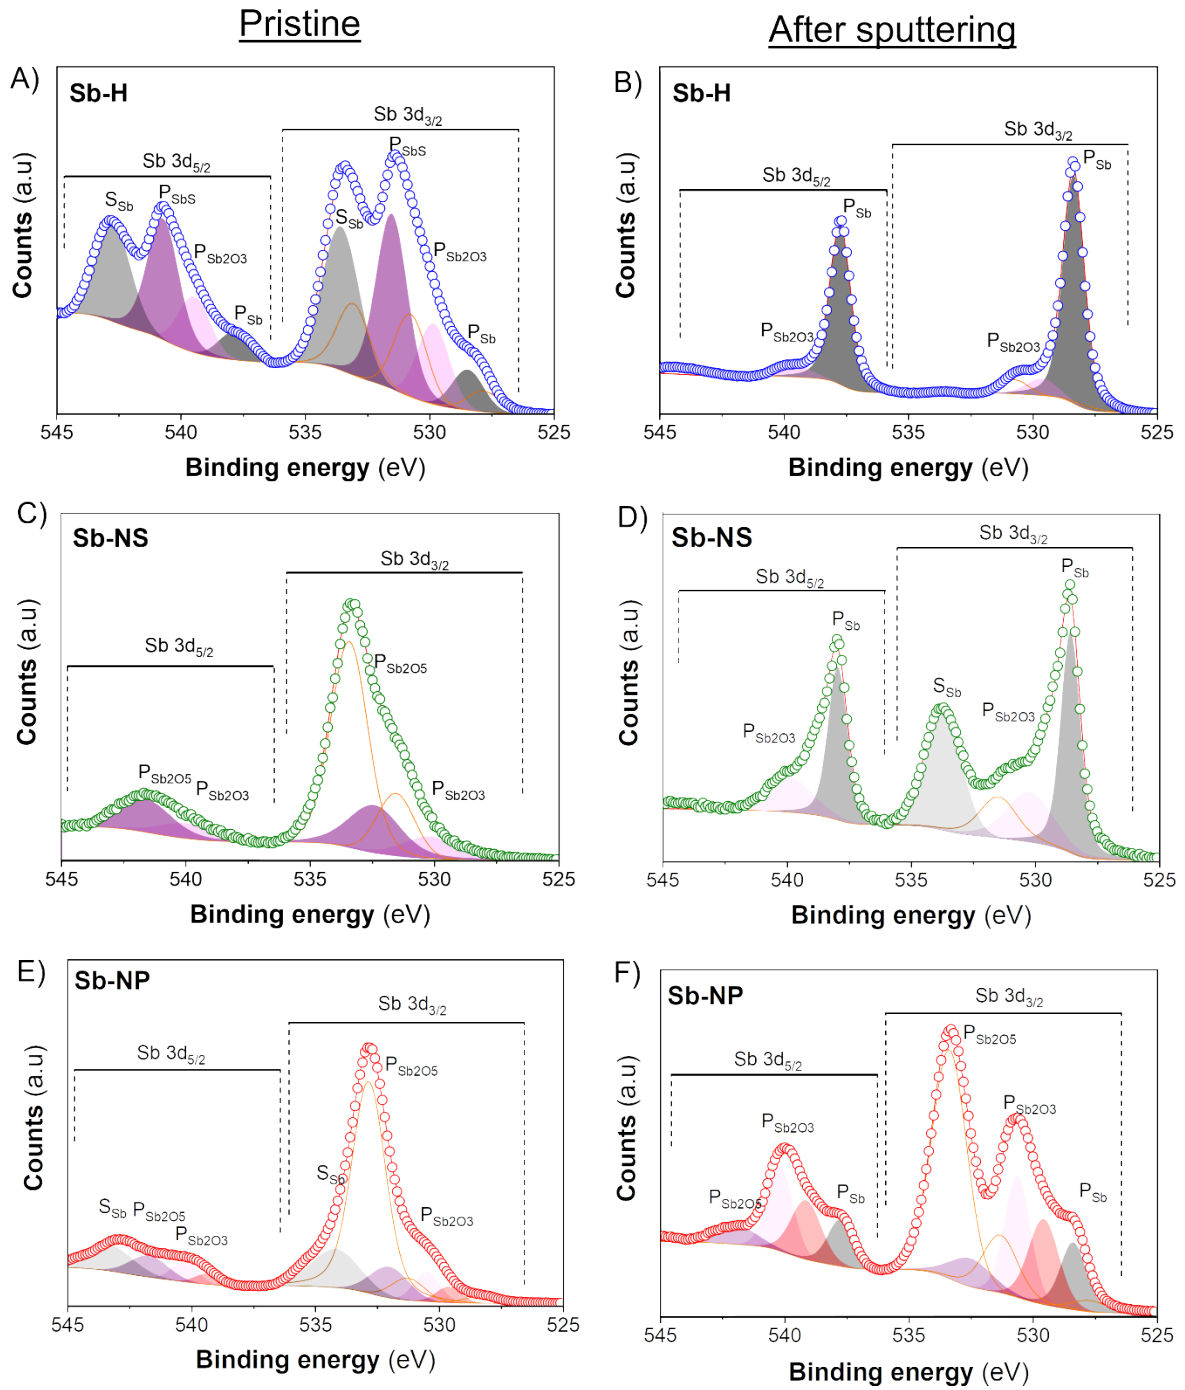

**Figure S4:** Deconvoluted XPS spectra of the nanomaterials before A, C, E) and after B, D, F) the sputtering process of the three Sb-Nanomaterials. P indicates the peak of the indicated atom and S the satellite.

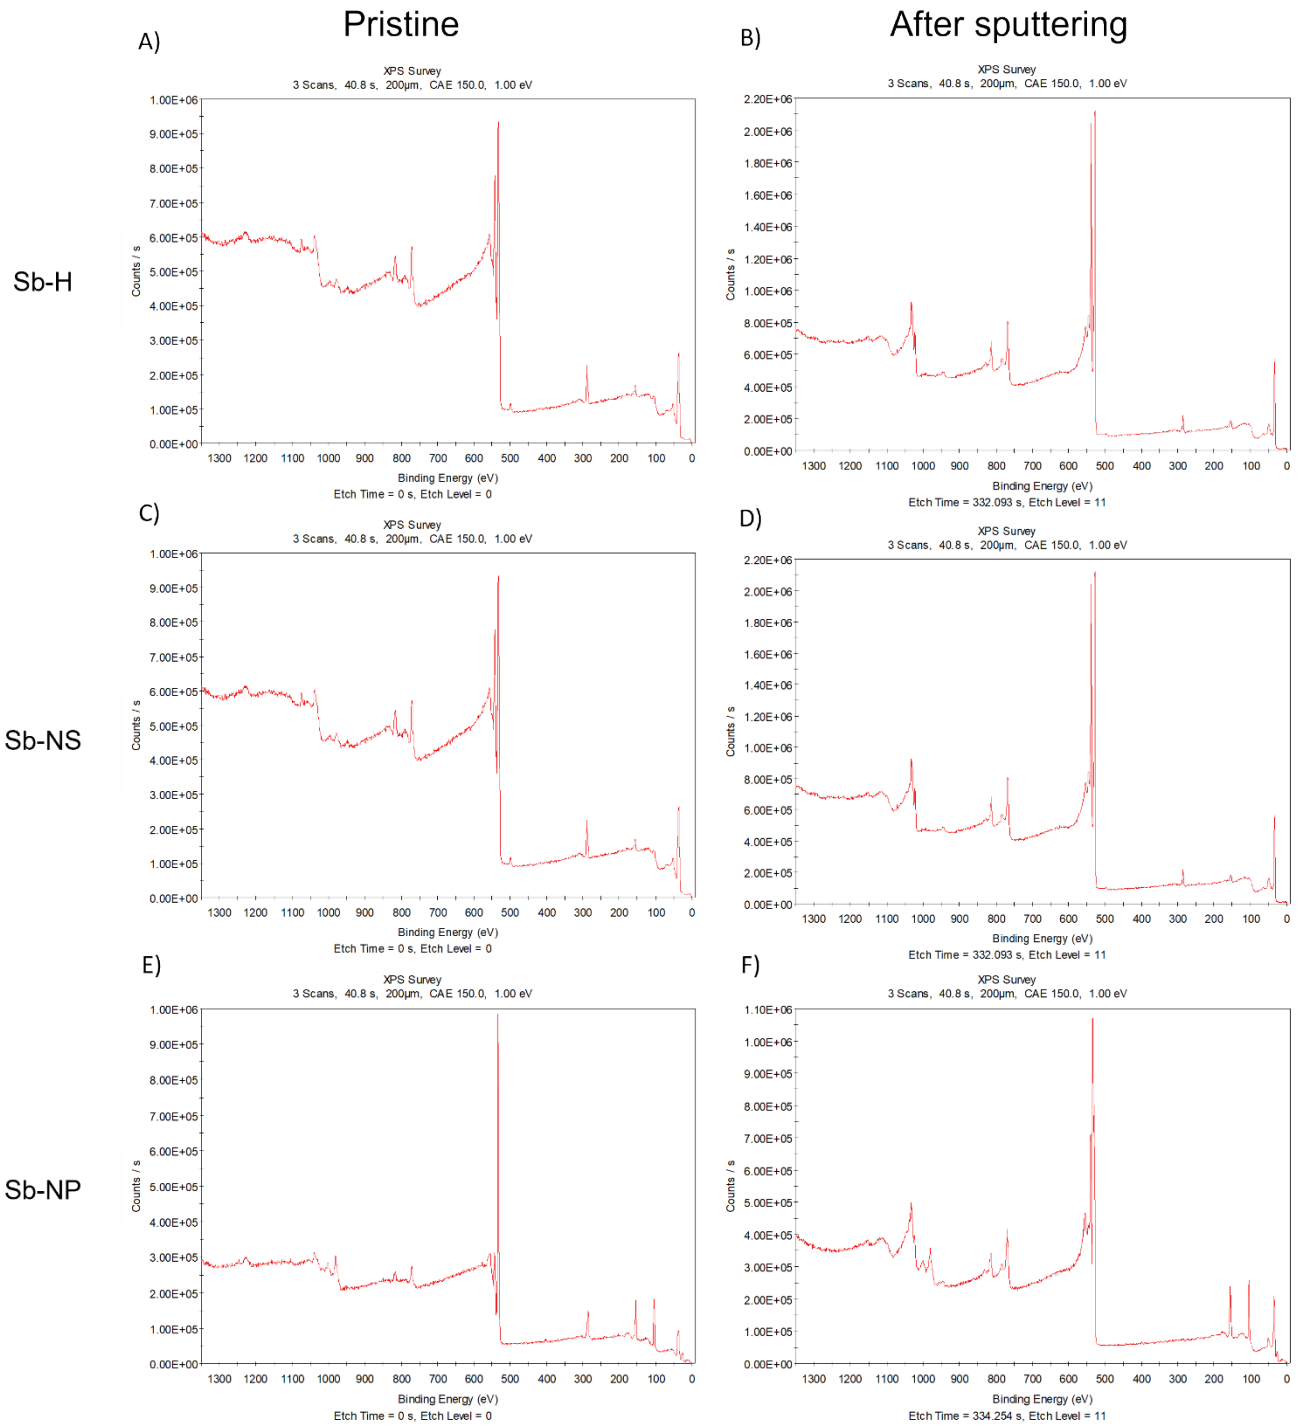

**Figure S5:** XPS surveys of the nanomaterials before A, C, E) and after B, D, F) the sputtering process of the three Sb-Nanomaterials.

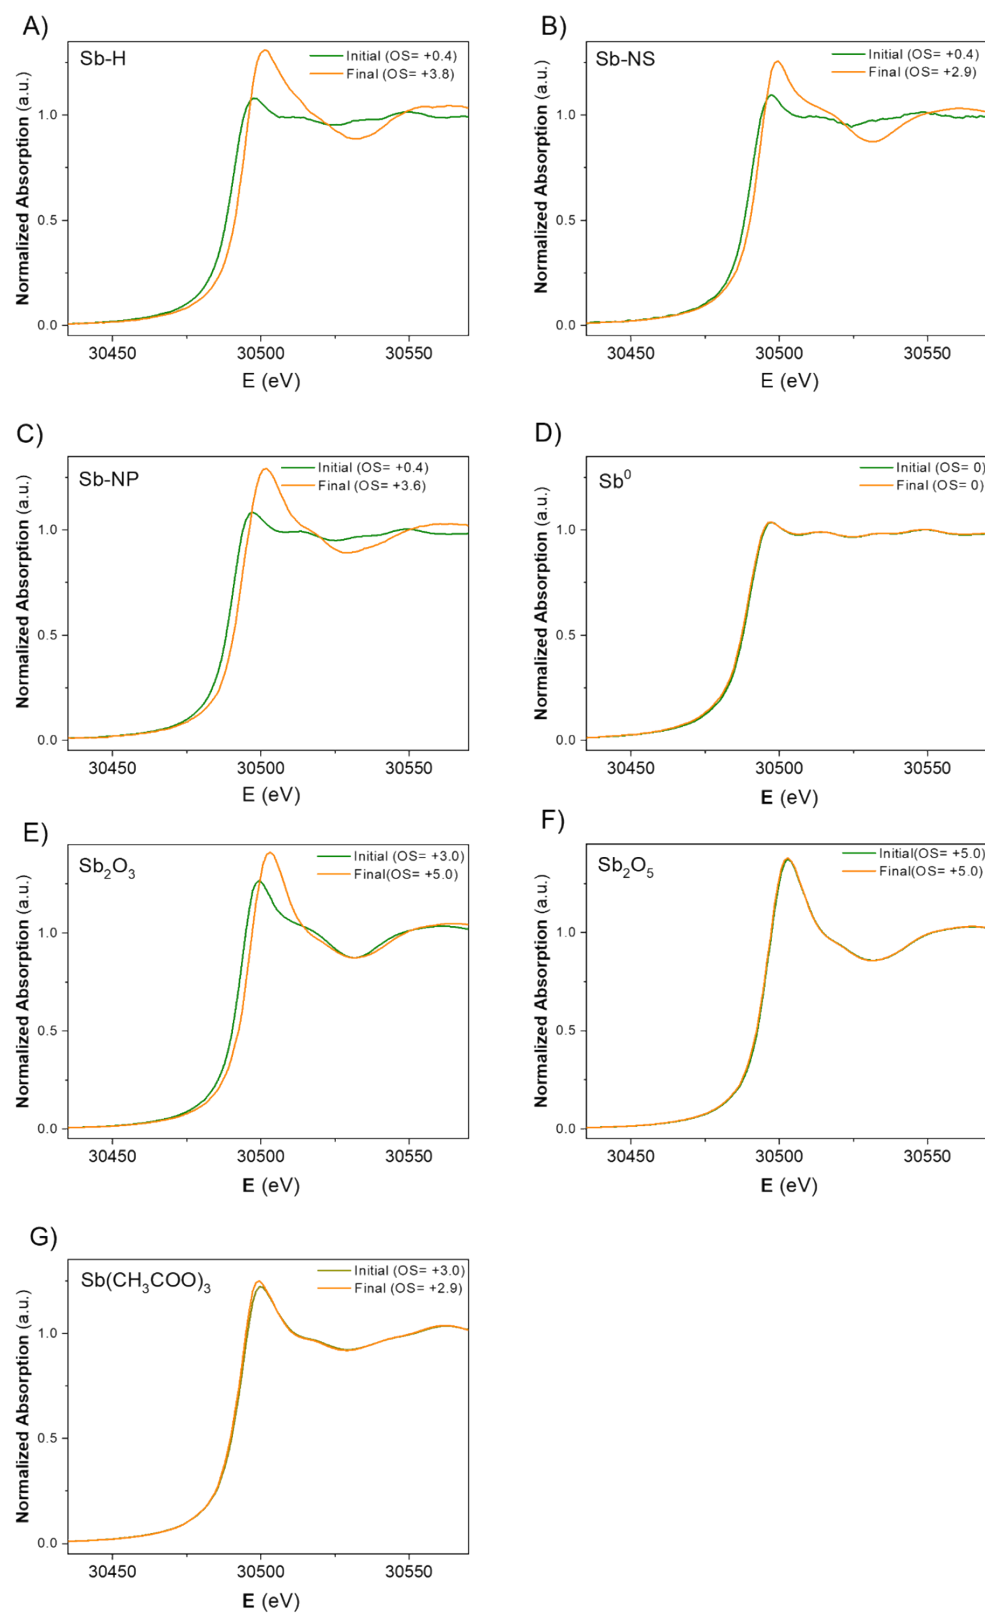

**Figure S6:** XANES spectra of the ex-situ measurements on the Sb reference species before (initial) and after (final) incubating 1 week in DMEM cell culture media.

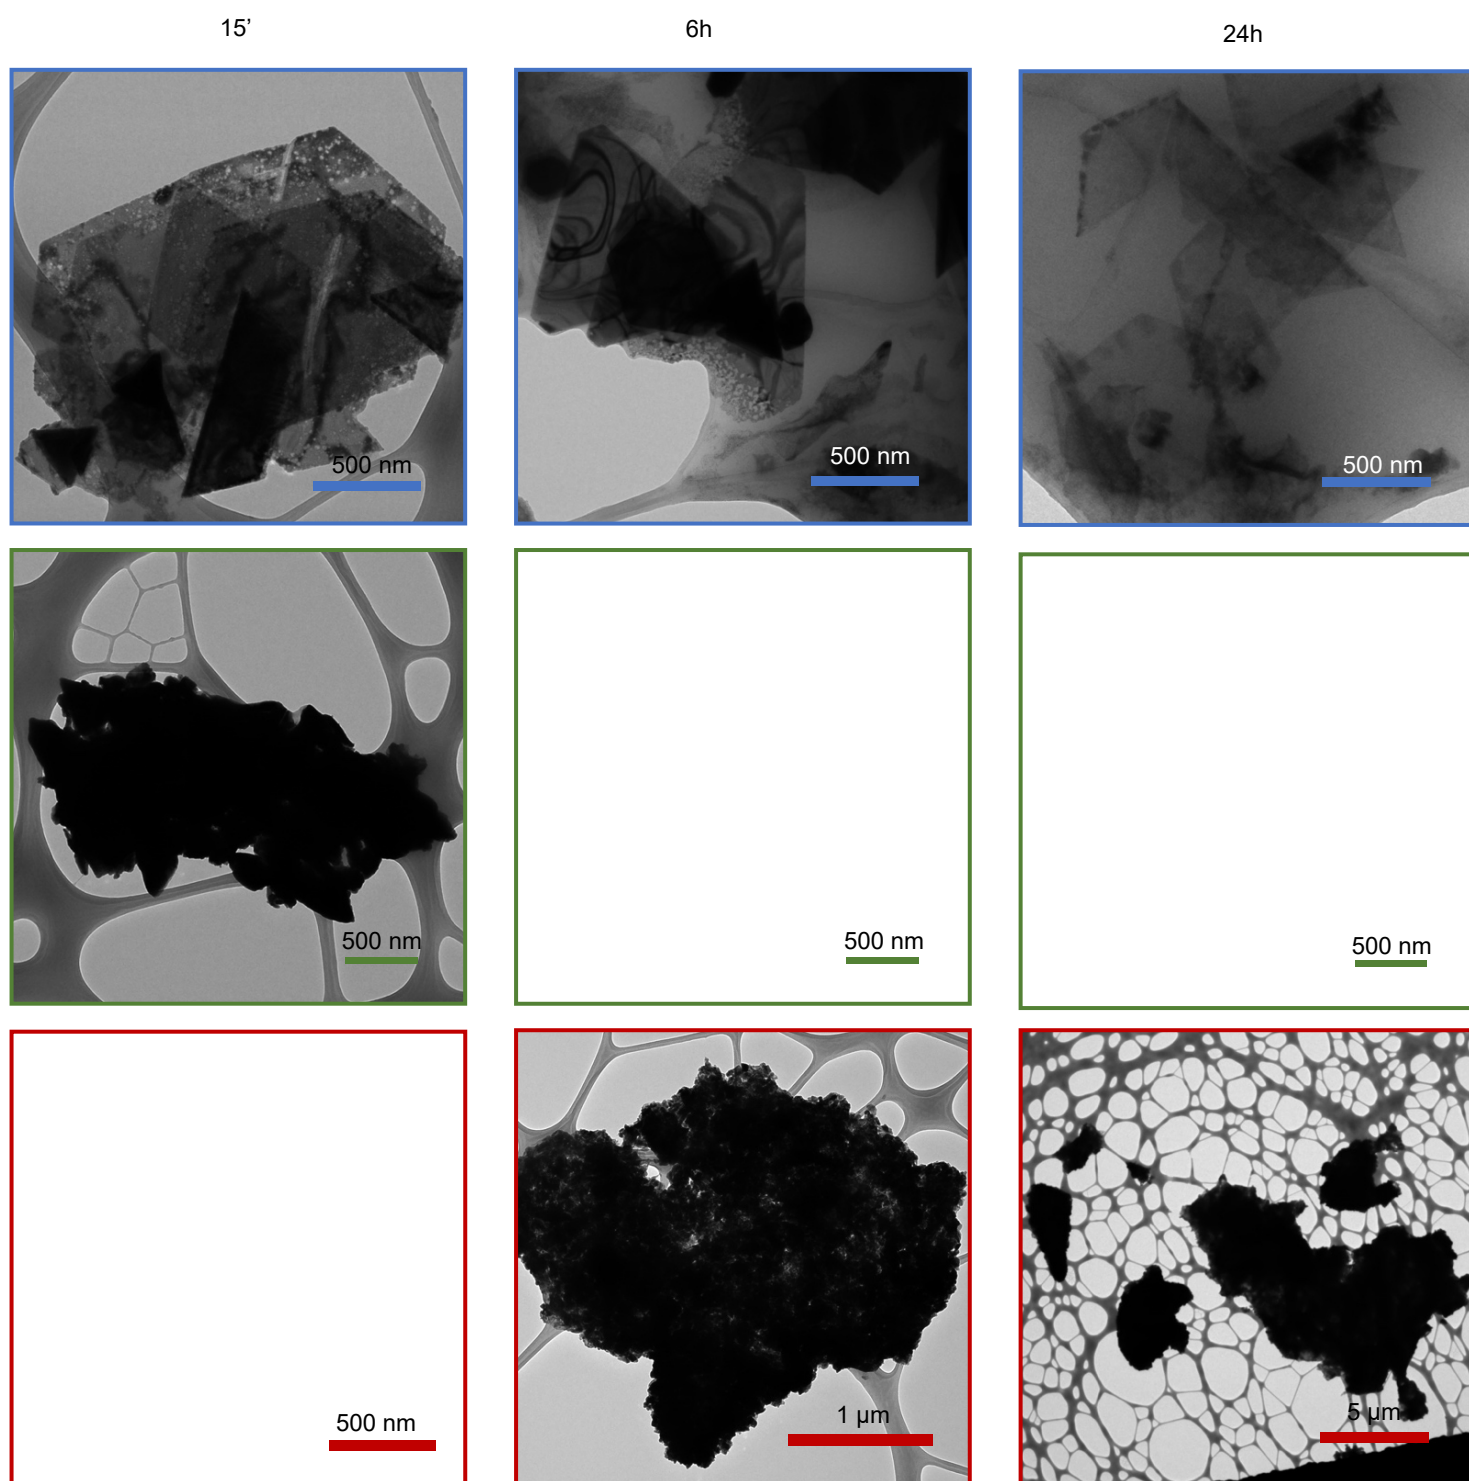

**Figure S7:** TEM images of the Sb-nanomaterials incubated at 37 °C in DMEM during the indicated times for the Sb-H, Sb-NS and Sb-NP samples highlighted in blue, green and red colors, respectively.



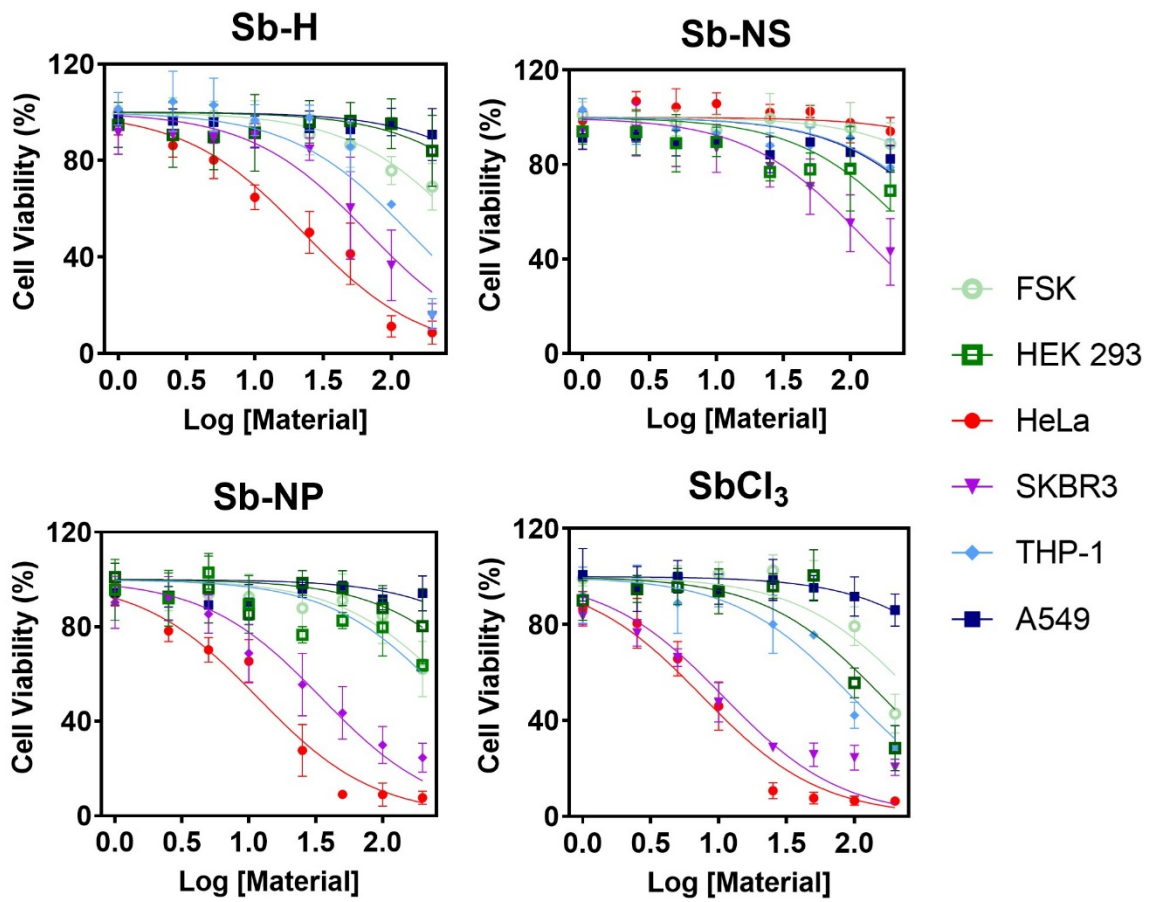

**Figure S8:** Dose-response curves of the tested compounds, obtained from the MTT viability assays. Obtained using the GraphPad Prism 8 software.

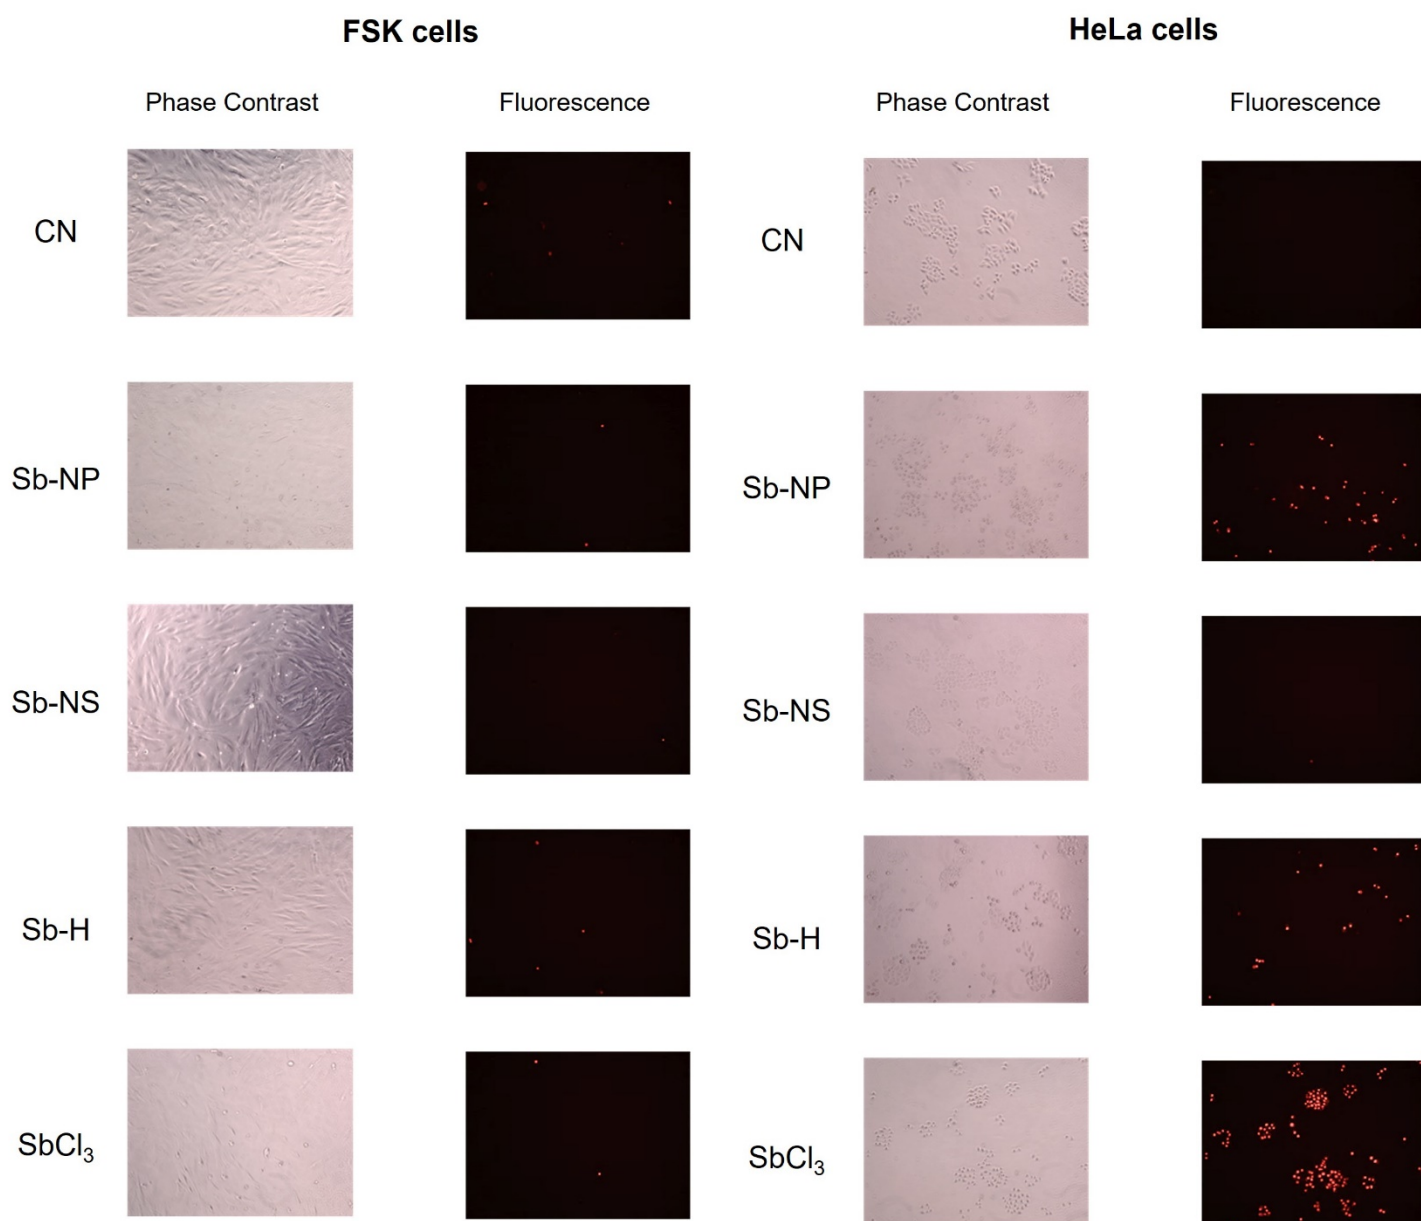

**Figure S9:** Optical microscope images and fluorescent images ( $\lambda_{exc}= 545nm$ ) of the Propidium iodine test after treatment with the different nanomaterials at 25  $\mu g/mL$ .

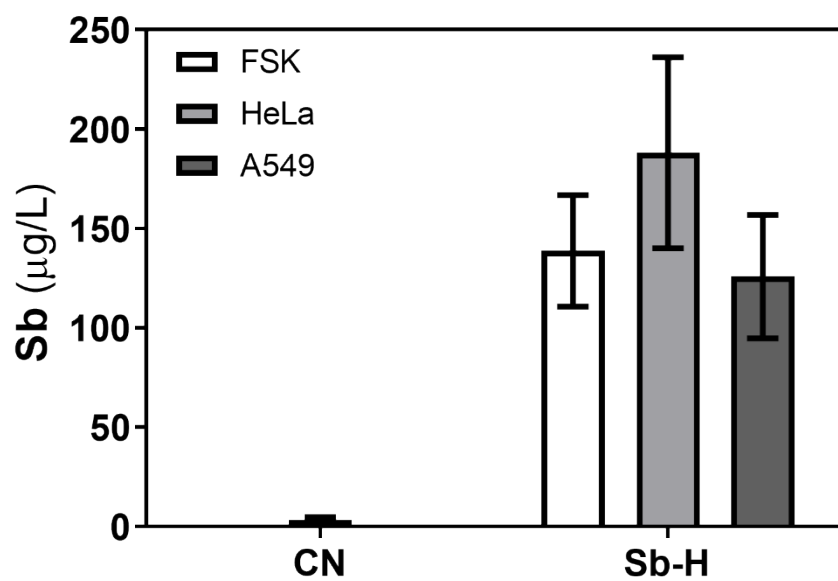

**Figure S10:** ICP-MS analysis of the intracellular content of the cells treated with the Sb-H at 25 µg/mL.

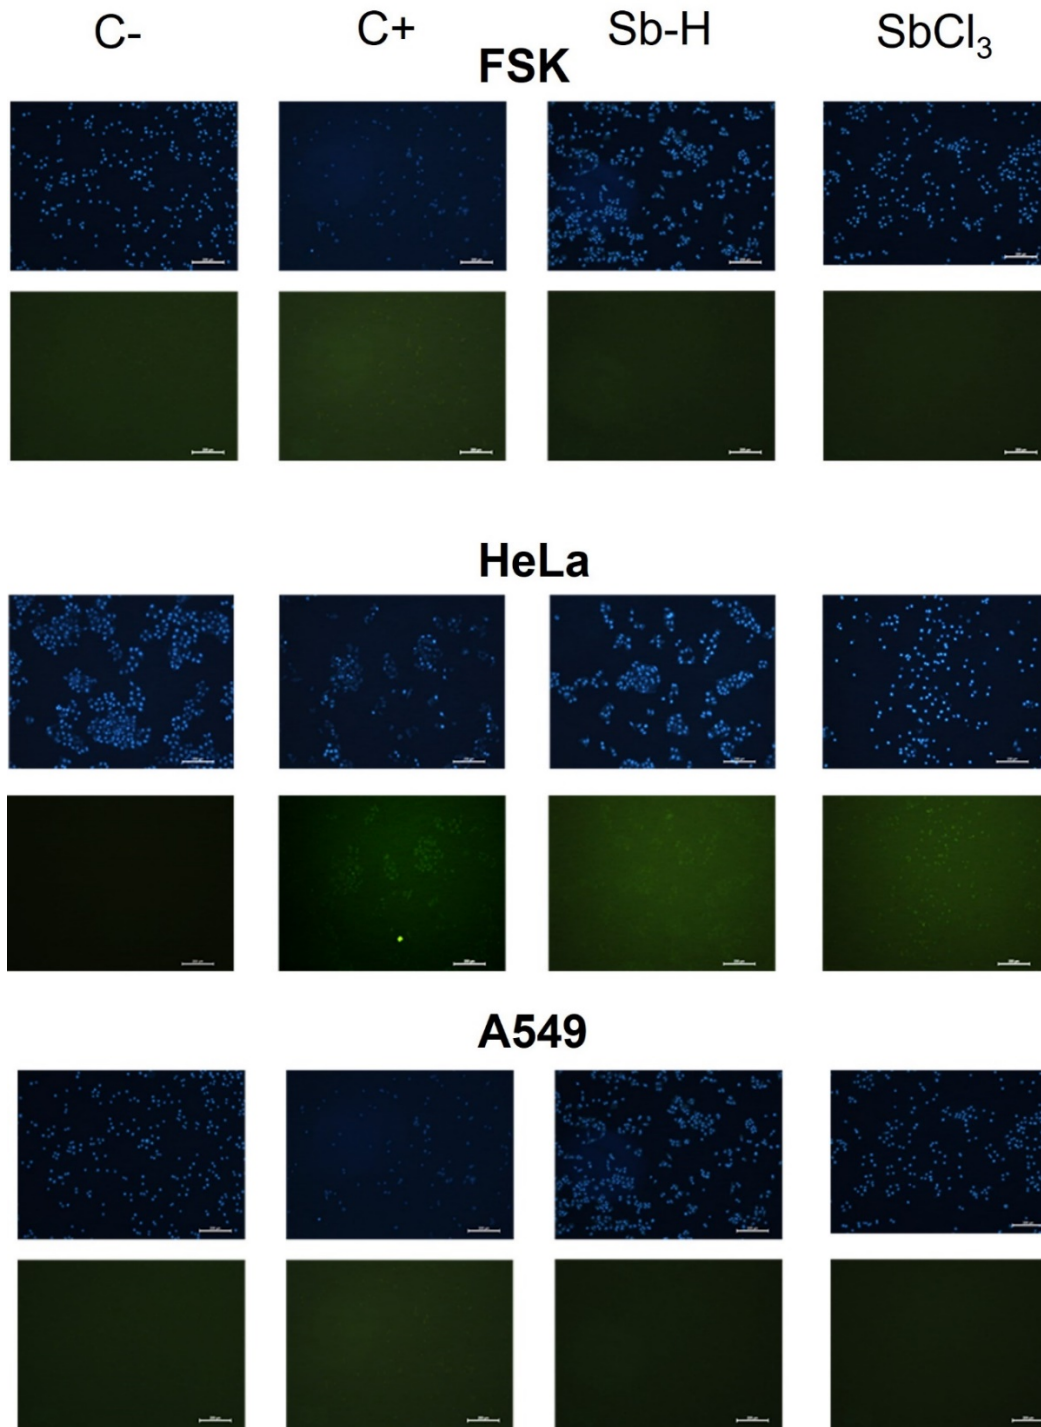

**Figure S11:** Representative fluorescence microscopy images of ROS experiments. Cell lines (HeLa, FSK and A549) were seeded on 24-well plates and incubate in the presence of Sb-nanomaterials at 25  $\mu\text{g}/\text{mL}$  for 24h. Next day, cells were treated with 25 $\mu\text{M}$  of 6-carboxy-2',7'-dichlorodihydrofluorescein diacetate (carboxy- $\text{H}_2\text{DCF-DA}$ ) to detect ROS formation (Fluorescein FITC filter) and Hoechst 33342 to visualize nuclei (DAPI filter). C-: non treated cells, C+: cells treated with tert-butyl hydroperoxide (100  $\mu\text{M}$ ). SB-H: cells treated with Sb nanomaterial. SbCl<sub>3</sub>: cells treated with antimony trichloride. Scalebar 200  $\mu\text{m}$ .
